# Supplementary material for: Preparation of WO3-based flexible electrochromic fabrics and their near infrared shielding application
Source: Royal Society of Chemistry journal article supplement (doi:10.1039/d4tc00403e), 2024-01-01
Supplement: d4tc00403e1.pdf [file d4tc00403e1.pdf]

## Supporting information

Preparation of  $\text{WO}_3$  based flexible electrochromic fabric and near infrared shielding application

Mengjie Li, Wei Jiang, Yun Lin, Chengjie Huang, Panpan Hao, Wenwen Wang, Liyan Yang, Yuedan Wang\*, Dong Wang\*

Key Laboratory of Textile Fiber and Products (Ministry of Education), Wuhan Textile University Wuhan 430200, China

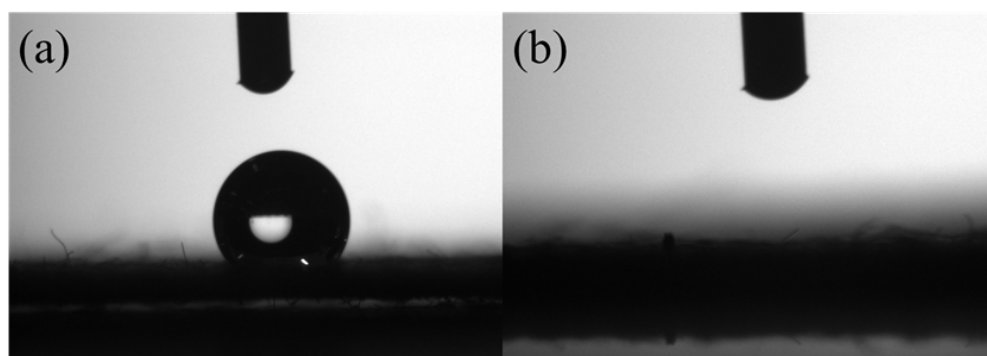

Fig. S1. Contact angle measurements of carbon cloth a) before treatment, b) after treatment.

---

\*Corresponding authors. *E-mail addresses*: wydan2015@163.com (Y. Wang), wangdon08@126.com (D. Wang).

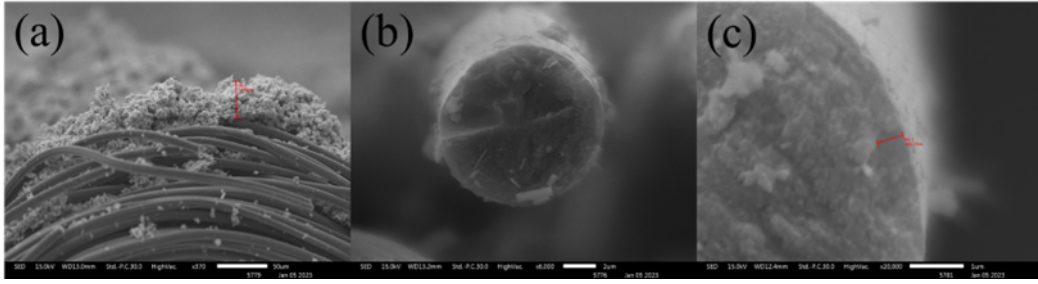

Fig. S2. SEM of WO<sub>3</sub>-1.0, (a) cross-section of WO<sub>3</sub>-1.0, (b) cross section of a single carbon fiber and WO<sub>3</sub> film, c) enlarged SEM of b.

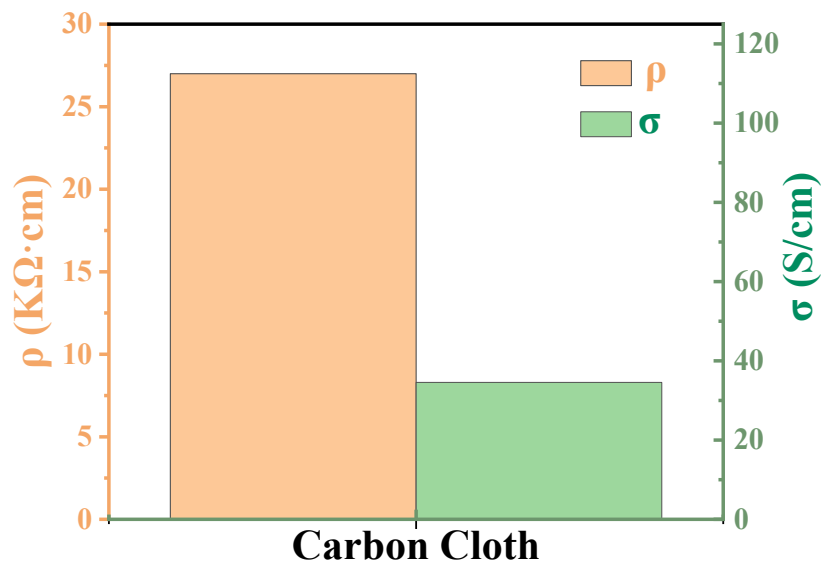

Fig. S3. Histogram of resistivity and conductivity of carbon cloth substrate.

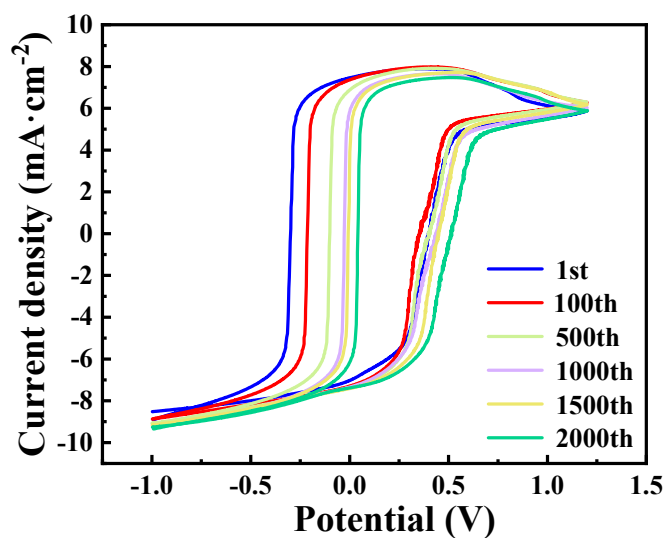

Fig. S4. CV curves of  $\text{WO}_3$ -1.6 sample after 2000 cycles at  $-1.0\text{ V}\sim+1.2\text{ V}$  with scanning rate of  $50\text{ mV/s}$ .

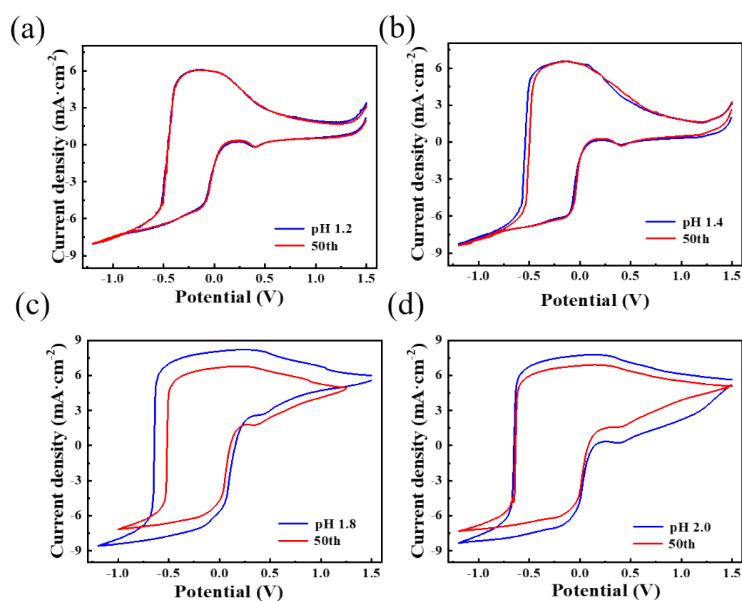

Fig. S5. Cyclic voltammetry curve at a scanning rate of  $50\text{ mV/s}$  in the range of  $-1.2\text{ V}\sim+1.5\text{ V}$  and its voltammetry curve after 50 cycles. (a)  $\text{WO}_3$ -1.2, (b)  $\text{WO}_3$ -1.4, (c)  $\text{WO}_3$ -1.8, and (d)  $\text{WO}_3$ -2.0 fabrics.

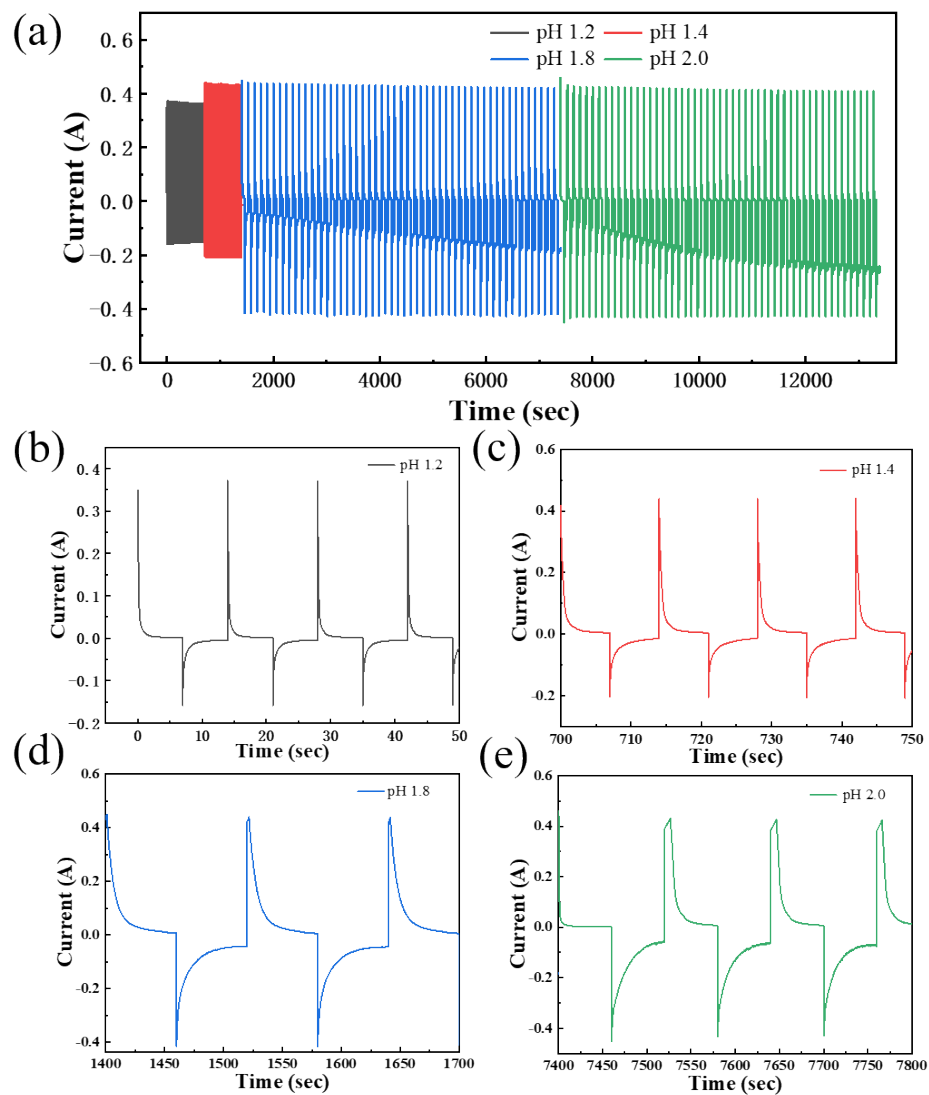

Fig. S6. Chronoamperometry curve for 100 cycles of (a)  $\text{WO}_3$ -1.2, b)  $\text{WO}_3$ -1.4, c)  $\text{WO}_3$ -1.8, and d)  $\text{WO}_3$ -2.0 fabrics.

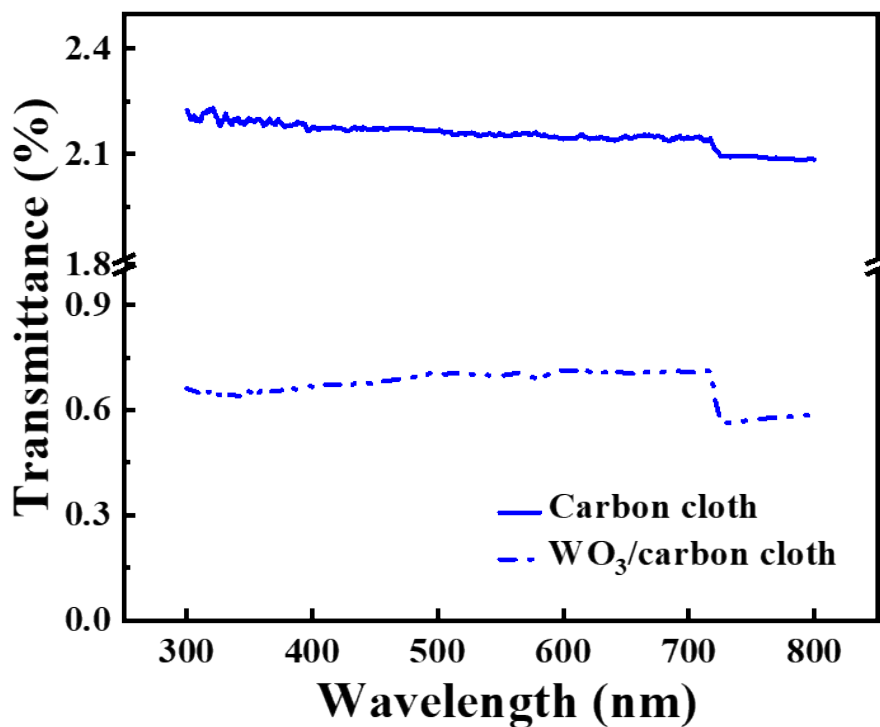

Fig. S7. Transmittance measurement of pure carbon cloth and WO<sub>3</sub>/carbon cloth between 300 and 800 nm.

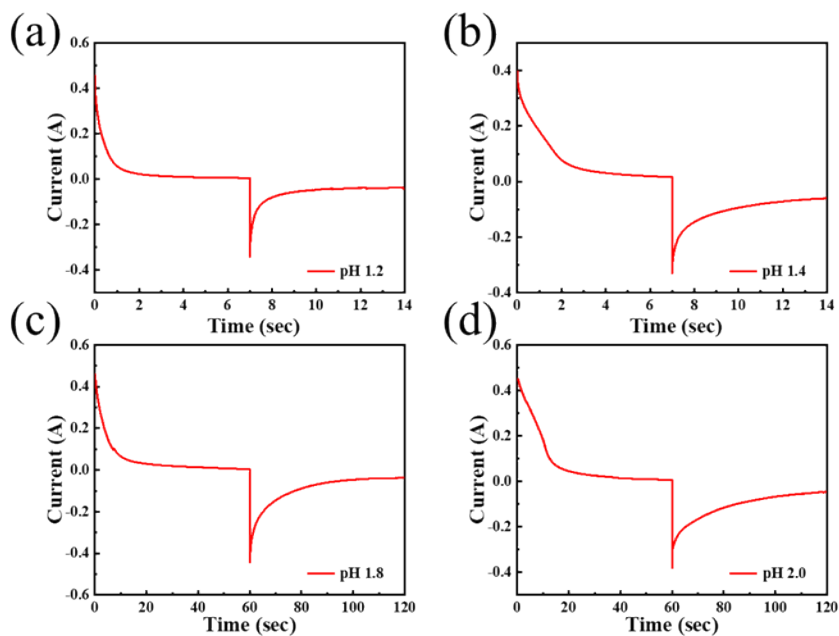

Fig. S8. Switching time characteristics between the colored and bleached states. (a) WO<sub>3</sub>-1.2, (b) WO<sub>3</sub>-1.4, (c) WO<sub>3</sub>-1.8, and (d) WO<sub>3</sub>-2.0 fabrics.

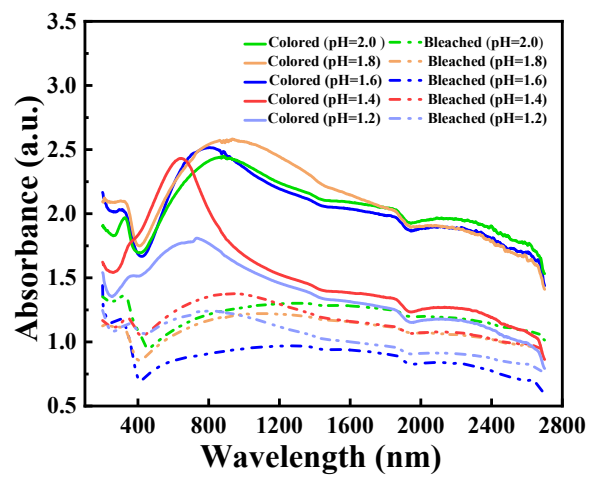

Fig. S9. Absorbance spectra of different samples in the 200~2700 nm wavelength
